# Supplementary material
Source: publisher site journal article supplement (https://www.spandidos-publications.com/712/downloadSupplementary)

Figure S1. Effect of 2,4-DHBA and 2,6-DHBA on colony formation in MDA-MB-231 cells. Quantification of the data is shown beside the crystal violet stained image of the colonies. 2,4-DHBA, 2,4-dihydroxybenzoic acid; 2,6-DHBA, 2,6-dihydroxybenzoic acid.

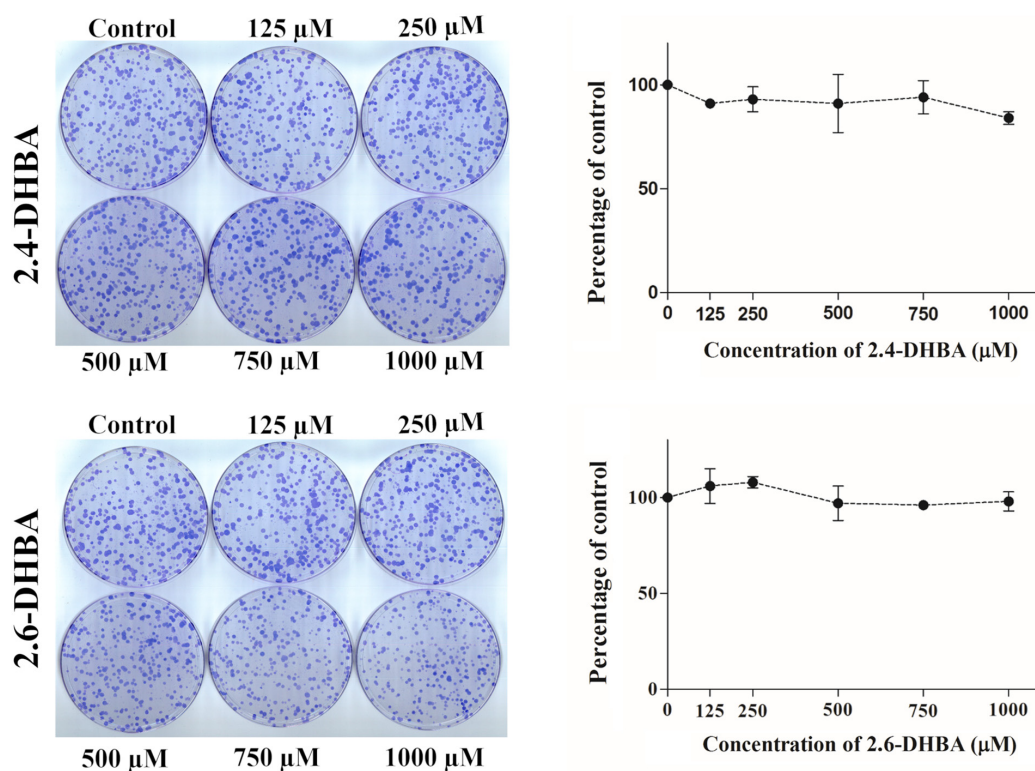

Figure S2. Effect of (A) 2,3-DHBA and (B) 2,5-DHBA on cell number in MDA-MB-231 cells. Cells were seeded at a density of 250,000 cells/100 mm plate overnight and treated with the indicated compounds for 48 h. Cells were then trypsinized and counted using an automated cell counter. In total, >96% of the cells were viable. 2,3-DHBA, 2,3-dihydroxybenzoic acid; 2,5-DHBA, 2,5-dihydroxybenzoic acid.

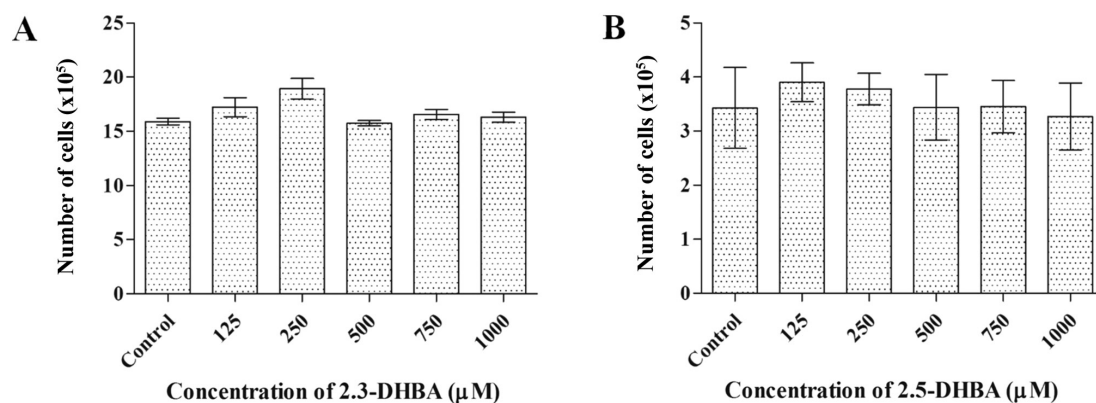

Supplement: Supplementary file 1 [file downloadSupplementary]
